# Supplementary material
Source: PubMed Central journal article supplement (PMC29314)
Supplement: pnas_98_4_1665__2.pdf [file pnas_98_4_1665__2.pdf]

Edited Dlx Alignment

xenopusXdl1 ... .MTTMAD GLEAQDSSKS AFMEF.GQQQ ... .SHSQQ SSPV.MAAGH  
zfishDlx6 ..MMTMTTMAD GLEAQDSSKS AFMEF.GQQ. ....SHSQQ SSPS.MAASH  
mouseDlx6 .....  
zfishDlx1 ..MTMSTIPE SLNSPVSGKS VFMEF.GPP. ....SQQ MSPSSMTHGH  
mouseDlx1 ..MTMTTMPE SLNSPVSGKA VFMEF.GPP. ....NQQ MSPSPMSHGH  
zfishDlx7 ..MMSMFMSD TLNSSDPSKS AFLEF.GHGL ....ASNQQ HLSG.FAHNI  
zfishDlx8 ..MTMDSLSE SLEASDPSKS AFLEF.SHGY ....QSHQQ HSPG.VSHAH  
mouseDlx5 ..MTG.VFDR RVPSIRSGDF QAPFP.TSA. ...AMHHPSQ ESPT.....  
chickDlx5 ..MTA.VFDR RVPGIRSSDF QPPFQ.SAA. ...AMHHPSQ ESPT.....  
xenopusDl13 ..MTG.VYER RVASIRASEF QS..... ..MMHHPSQ DSPT.....  
zfishDlx4 ..MTG.VFDR RIPSIRKPA DF QNPFQ.LS.. ...TMHHPSQ ESPT.....  
zfishDlx2 ..MTG.VFDS LSTDMHSNQI TSSS..YH.. ....SLHKSQ ESPT.....  
zfishDlx5 ..MTA.VLDS LGSDMHTNHI TSSS..FS.. ....TVHKSQ DSPT.....  
xenopusDl14 ..MTG.VFDS LAADMHSNHM PSSS..YH.. ....SLHKSQ ESPT.....  
xenopusDl11 ..MTG.VFDS LAADMHSNHM PSSS..YH.. ....SLHKSQ ESPT.....  
mouseDlx2 ..MTG.VFDS LVADMHSTQI TASST.YHQH QONSSLHKPQ ESPT.....  
mouseDlx3 ..MSG.SFDR KLSSILTDIS SS..... ..LSCHAGSK DSPT.....  
zfishDlx3 ..MSGPTYDR KIPGISTDLS GS..... ..MSCHPTSK DSPT.....  
xenopusxdl12 ..... ..GAVLTDLT ..... ..TSCHPVTK DSPT.....  
xenopusDl12 ..MSG..PYE KKMAVLTDLS ..... ..TSSHVPVK DSPT.....  
Delta ..... ..MMSAST AATS..... ..MAHHTH HYPH....HC  
Alpha ..MTE.VFEC SSADPRPDM KRDDAD.VYGL SHPQHSHSHH HHPQAQSSPT  
Gamma ..MTD.VFDC GSADLRPDM KREAD.FYG. ....LHQAH SSPT.....  
Beta .....  
amphi ..... ..MEIPPVQ QTPVMSM...

xenopusXdl1 YPSLHCLHSG SHHHHQHQHD TN.YSGSNSY SRSLAA.... .. .YPYMSH  
zfishDlx6 YP.LHCLHSG SHHH..HQHD SSPYSGSNSY NRSLP..... .. .YSYVSH  
mouseDlx6 .....  
zfishDlx1 YS.MHCLHSS GHPQ....HD SA.YSPAPSF PRSLP..... .. .YPYVNS  
mouseDlx1 YS.MHCLHSA GHSQ....PD GA.YSSASSF SRPLG..... .. .YPYVNS  
zfishDlx7 YP.VHGLHSG GHLQ....HD APYPSSAPHY SRPLG..... .. .YAYPGP  
zfishDlx8 YP.VHGLHQG AHSQ....YD AAFSPGAASY SRPLA..... .. .YHYS..  
mouseDlx5 LPESSTATSD YYSP....AG AAPHGYSPT SASYGKALNP ....YQYQYH  
chickDlx5 LPESSTATSD YYSP....TG AAPHGYSPT SASYGKALNP ....YQYQY.  
xenopusDl13 LPESSTATD SG YYSPG.AAAG HPHHGYCSP SATYGKALNA ....YQYQYH  
zfishDlx4 LPESSTATD SG YYSP....AG GVHHGYCSPN SGTYGKPLNA ....YQYQYH  
zfishDlx2 LPVSTATDSS INNNTT.QQ.. ....CAGSPY GQS..... ..SSYQYQ  
zfishDlx5 LPVSTATDSS FFSSS.QTGH ....CAGTAY AQL..... ..ASYSYH  
xenopusDl14 LPVSTATDSS YYTNQ.QQQQ ..HCGAVSPY GQL..... ..GSYQFH  
xenopusDl11 LPVSTATDSS YYTNQ.QQQ. ..HCGAGSPY GQL..... ..GSYQFP  
mouseDlx2 LPVSTATDSS YYTNQ.QHPA GGGGGASPY AHM..... ..GSYQYH  
mouseDlx3 LPESSTATDMG YYSAP..... QHDYYSGOPY GQTVNPTY. ...HHQFNLN  
zfishDlx3 LPESSTATDMG YYSS..... HHEYYSPPY PQQMNSY... ..HQFNLS  
xenopusxdl12 LPESSTATDMG YYSGH.LSAG QHDFPPTQTY SPSISSYGYP HP...QYNFN  
xenopusDl12 LPESSTATDMG YYNGH.LSTG QHDFFTQAY SPTISSYGYP HPPHPQYNFN  
Delta LP.SAGHDSS YAAAA..AAA AAAAAASYQ SRPLG..... ..YPYLN  
Alpha LPESSTATD SG CYHHP..SPS SAYQAYGPYC PPAVAAYNQ PLSPYAHQL  
Gamma LPESSTATDSS MSYYP..SPP SAYAGYSYC APAYGQQQQ PLNHYPYQLP  
Beta ..... ..Q HQQQHQQQ QQQLS..... ..AYYAA  
amphi MNHSSYPVRC LHPTS.HTQH ESAFSTAAPH SRPLG..... ..YPFSMN

|               |                        |             |            |            |
|---------------|------------------------|-------------|------------|------------|
| xenopusXd11   | S.H..SPYL. ....TTV     | IENGEIR.FN  | GKGKKIRKPR | TIYSSLQLQA |
| zfishDlx6     | P.H..SPYL. ....TTV     | IENGEIR.FN  | GKGKKIRKPR | TIYSSLQLQA |
| mouseDlx6     | .....TTV               | IENGEIR.FN  | GKGKKIRKPR | TIYSSLQLQA |
| zfishDlx1     | VGHSSSPYLS TV.....NTV  | VEGGEVR.FN  | GKGKKIRKPR | TIYSSLQLQA |
| mouseDlx1     | VSHASSPYIS SV.....STV  | VEGGEVR.FN  | GKGKKIRKPR | TIYSSLQLQA |
| zfishDlx7     | VSAAPGAYMP .Y.....PAV  | IENGEIR.LN  | GKGKKIRKPR | TIYSSVQLQA |
| zfishDlx8     | TAHHPGAYLP .Y.....QSS  | IESGEIR.LN  | GKGKKIRKPR | TIYSSLQLQA |
| mouseDlx5     | GVGSAAGYPA KAYADYGEKE  | VAEPEVRMVN  | GKPKKVRKPR | TIYSSFQLAA |
| chickDlx5     | GMGSAGTYPA KAYADYGEKE  | VAEPEVRMVN  | GKPKKVRKPR | TIYSSFQLAA |
| xenopusD113   | GMGAAANYSG KAYS DYGEKE | VSEPEVRMVN  | GKPKKIRKPR | TIYSSFQLAA |
| zfishDlx4     | GVSSGNYSYSA KSYDPYGEKE | TAEPEVRMVN  | GKPKKVRKPR | TIYSSFQLAA |
| zfishDlx2     | NNMNSVQYNT KS.YELGEKE  | EREPEIRMVN  | GKPKKVRKPR | TIYSTFQLAA |
| zfishDlx5     | PGVGNVHYSP KA.YDLGEKE  | ESEPEVRMVN  | GKPKKVRKPR | TIYSSFQLAA |
| xenopusD114   | GAINGISYST KS.YDLSEKE  | DCEPEVRMVN  | GKPKKVRKPR | TIYSSFQLAA |
| xenopusD111   | G.INGISYST KS.YDLSEKE  | ECEPEVRMVN  | GKPKKVRKPR | TIYSSFQMAA |
| mouseDlx2     | ASLNNVSYSA KSSYDLGDKE  | DLEPEIRIVN  | GKPKKVRKPR | TIYSSFQLAA |
| mouseDlx3     | GLGT.GAYSP KSEYTYGVKE  | EPEAEVRMVN  | GKPKKVRKPR | TIYSSYQLAA |
| zfishDlx3     | GMATPGAYPT KTEYPYNVKE  | EPETEVRMVN  | GKPKKIRKPR | TIYSSYQLAA |
| xenopusxld112 | GLGN.EGYLS KDDYQYGVKE  | EPETEVRMVN  | GKPKKIRKPR | TIYSSYQLAA |
| xenopusD112   | GLGN.ESFLP KDDYQY.VKE  | EPETEVRMVN  | GKPKKIRKPR | TIYSSYQLAA |
| Delta         | IGGTGGASGG YSLGALPTPV  | IHNCEL.R.FN | GKGKKIRKPR | TIYSSLQLQA |
| Alpha         | GRYGAAGYGP GATGGAAEEEE | SRQSGVRMVN  | GKPKKIRKPR | TIYSSFQLAA |
| Gamma         | LQDKSYHQGY HQYGVFGEEA  | SRESGVRMVN  | GKPKKIRKPR | TIYSSFQLAA |
| Beta          | AEALDAPYDA KERGDYDPKD  | DSEPEARLVN  | GKPKKVRKPR | TIYSSFQLAA |
| amphi         | PMPYGNPYST AAVTP..TDK  | SPDPTDQRIN  | GKGKKMRKPR | TIYTSFQLQQ |

|               |                       |            |            |            |
|---------------|-----------------------|------------|------------|------------|
| xenopusXd11   | LNHRFQQTQY LALPERAELA | ASLGVTTQTV | KIWFQNKRSK | YKKLIKQGNM |
| zfishDlx6     | LNHRFQQTQY LALPERAELA | ASLGLTQTV  | KIWFQNKRSK | FKKLLKQGGN |
| mouseDlx6     | LNHRFQQTQY LALPERAELA | ASLGLTQTV  | KIWFQNKRSK | FKKLLKQGSN |
| zfishDlx1     | LNRRFQQTQY LALPER.ELA | ASLGLTQTV  | KIWFQNKRSK | FKKLMKQGGG |
| mouseDlx1     | LNRRFQQTQY LALPERAELA | ASLGLTQTV  | KIWFQNKRSK | FKKLMKQGGG |
| zfishDlx7     | LHQRFQQTQY LALPERADLA | AKLGLTQTV  | KIWFQNKRSK | YKKIMKHGSS |
| zfishDlx8     | LNQRFQQTQY LALPERADLA | AKLGLTQTV  | KIWFQNKRSK | YKKIMKHGSS |
| mouseDlx5     | LQRRFQKTQY LALPERAELA | ASLGLTQTV  | KIWFQNKRSK | IKKIMKNGEM |
| chickDlx5     | LQRRFQKTQY LALPERAELA | ASLGLTQTV  | KIWFQNKRSK | IKKIMKNGEM |
| xenopusD113   | LQRRFQKTQY LALPERAELA | ASLGLTQTV  | KIWFQNKRSK | IKKIMKNGEL |
| zfishDlx4     | LQRRFQNTQY LALPERAELA | ASLGLTQTV  | KIWFQNKRSK | LKKIMKNGEL |
| zfishDlx2     | LQRRFQKTQY LALPERAELA | ASLGLTQTV  | KIWFQNRRSK | FKKLWKSGEI |
| zfishDlx5     | LQRRFQKTQY LALPERAELA | ASLGLTQTV  | KIWFQNRRSK | FKKLWKNGEI |
| xenopusD114   | LQRRFQKTQY LALPERAELA | ASLGVTTQTV | KIWFQNRRSK | FKKMWKSGEI |
| xenopusD111   | LQRRFQKTQY LALPERAELA | ASLGLTQTV  | KIWFQNRRSK | FKKMWKNGEM |
| mouseDlx2     | LQRRFQKTQY LALPERAELA | ASLGLTQTV  | KIWFQNRRSK | FKKMWKSGEI |
| mouseDlx3     | LQRRFQKAQY LALPERAELA | AQLGLTQTV  | KIWFQNRRSK | FKKLYKNGEV |
| zfishDlx3     | LQRRFQKAQY LALPERAELA | AQLGLTQTV  | KIWFQNRRSK | FKKLYKNGEV |
| xenopusxld112 | LQRRFQKAQY LALPERAELA | AQLGLTQTV  | KIWNQNRRSK | FKKIYKNGEG |
| xenopusD112   | LQRRFQKAQY LALPERAELA | AQLGLTQTV  | KIWFQNRRSK | FKKLYKNGEG |
| Delta         | LNRRFQQTQY LALPERAELA | ASLGLTQTV  | KIWFQNKRSK | YKKLMKAGGA |
| Alpha         | LQRRFQQTQY LALPERAELA | ASLGLTQTV  | KIWFQNRRSK | FKKLGKNGEM |
| Gamma         | LQRRFQQTQY LALPERAELA | ASLGVTTQTV | KIWFQNRRSK | FKKIGKHGEM |
| Beta          | LQRRFERTQY LALPERAELA | ASLGLTQTV  | KIWFQNRRSK | FKRLVKSSEL |
| amphi         | LNRRFQRTQY LALPERAELA | AQLGLTQTV  | KIWFQNRRSK | YKKLMKQGGG |

|               |            |             |            |              |            |
|---------------|------------|-------------|------------|--------------|------------|
| xenopusXdll   | PL..EIDQLA | GTVALS.PRS  | PAIPP.VWDV | S.ASYMFGYS   | HWYSSPH... |
| zfishDlx6     | PH..ETDTLP | GSIALS.PRS  | PAIPP.IWDV | S.ASYMFGYS   | HWYSSPH... |
| mouseDlx6     | PH..ESDPLP | GSAALS.PRS  | PALPP.VWDV | S.ASYMFGYS   | HWYSSPH... |
| zfishDlx1     | TI..DTNALA | NGRGLS.TGS  | PSVAP.VWN. | ..TTYIPSYT   | SWYPTAH... |
| mouseDlx1     | AL..EGSALA | NGRAL.S.AGS | PPVPP.GWNP | NSSSYVPSYT   | SWYPSAH... |
| zfishDlx7     | GP..EGELLH | TSSSS..PCS  | PGLSQ.LWEV | SMANYMNNYG   | HWYPPHH... |
| zfishDlx8     | GP..EGEHLQ | AASASGAPCS  | PGMPP.LWDV | SMPSYMNSFG   | HWYSGHH... |
| mouseDlx5     | P...PEHSPS | SSDPMA.CNS  | PQSPA.VWEP | QGSSYLENSA   | .SWYPSA.AS |
| chickDlx5     | P...PEHSPS | SSDPMA.CNS  | PQSPA.VWEP | QGSSYLESPS   | .AWYP.A.AS |
| xenopusDll3   | P...PEHSPS | SSDPMA.CNS  | PQSPV.VWEP | QGSSYLENSG   | .VWYP...TG |
| zfishDlx4     | P...PEHSPS | SSDPMA.CNS  | PQSPA.VWDS | QGPQFLEMRE   | .LFVVFLYRG |
| zfishDlx2     | P...PEQHVA | SGESPP.HPS  | PPLAA.AWDF | AHSQFLTNY    | .WYSSTN... |
| zfishDlx5     | P...ADQQVA | SGDSP..SSS  | PPPQA.GWDF | PPNPFLTNY    | .WYSSTN... |
| xenopusDll4   | P...SDQLPV | GSESSP.CSS  | PSAST.TWDF | GPHQFLSNYS   | .WYQTSN... |
| xenopusDll1   | P...SDQLPV | GSESSP.CSS  | PPAST.TWDF | GQHQFLGNYS   | .WYQTSN... |
| mouseDlx2     | P...TEQHPG | ASASPP.CAS  | PPVSA.SWDF | GAPQFLGNYP   | .WYHQAS... |
| mouseDlx3     | P...LEHSPN | NSDSMA.CNS  | PPSPA.LWDT | SSHSYLDIPT   | SWYHTQN... |
| zfishDlx3     | P...LEHSPN | ASDSMA.CNS  | PPSPA.VWDN | NAHSYMEDYS   | HWYQ.Q.... |
| xenopusxldll2 | PG..LEHSPN | NSDSMA.CNS  | PSSPP.IWDN | SRSRYLENYH   | PWYTQQN... |
| xenopusDll2   | PD..MEHSPN | NSDSMA.CNS  | PSSPP.IWDN | SGSRYLENYH   | SWYTQQN... |
| Delta         | GL..ENNPLV | NTGCLPPSPV  | SGHPQ.VWDM | GPPAYMPPYS   | HWYSPSAH.. |
| Alpha         | AP..AQASPS | SSDPMA.CNS  | PASPG.HQQL | GSA AHL PQHP | PWYLQHQHQ  |
| Gamma         | MPTPAQASPA | SSDPMA.CDS  | PPSPG.LAPS | STTGQHQHQ    | QQHQHQHQHQ |
| Beta          | G...SEHSPG | ASDSMT.CDS  | PPSPADAIPH | GAPALMQVHV   | SSLSSSSSSS |
| amphi         | PP.PAVGTPN | SSAPNPVQQQ  | SGQPGHASPP | GAPTWAAATC   | TRMGRQQYQS |

|               |             |            |             |            |       |
|---------------|-------------|------------|-------------|------------|-------|
| xenopusXdll   | ..QDTMQRSQ  | MM.....    | .....       | .....      | ..... |
| zfishDlx6     | ..QDAMQR..  | .....      | .....       | .....      | ..... |
| mouseDlx6     | ..QDTMQRPQ  | MM.....    | .....       | .....      | ..... |
| zfishDlx1     | ..QDTMQQPQ  | LM.....    | .....       | .....      | ..... |
| mouseDlx1     | ..QEAMQQPQ  | LM.....    | .....       | .....      | ..... |
| zfishDlx7     | ..QDPVPRPQ  | MM.....    | .....       | .....      | ..... |
| zfishDlx8     | ..QDPMARTQ  | MM.....    | .....       | .....      | ..... |
| mouseDlx5     | S.INSHLPPP  | GSLQ.....  | .....HP..   | .....LALAS | GTLY  |
| chickDlx5     | P.LGSHLQPH  | GSLQ.....  | .....HP..   | .....LALPS | GTIY  |
| xenopusDll3   | T.HLQNLQNH  | ASLQ.....  | .....HP..   | .....LALAS | GTLY  |
| zfishDlx4     | D.EFFTLQAP  | GTL.....   | .....HS..   | .....LALGS | GTLY  |
| zfishDlx2     | ..SAAHLQP.  | .....      | .....PLHHN. | ..T..T.VSA | GTIF  |
| zfishDlx5     | ..AVTHLQPS  | .TLI.....  | .....QPHHS. | ..S..A.MST | GTIF  |
| xenopusDll4   | ..SAPHLQSN  | .PLLQ..... | .....QHHLHH | HPP..APISA | GTIF  |
| xenopusDll1   | ..PAPHLQSN  | .SLLQ..... | .....QHQLHH | HP....VSA  | GTIY  |
| mouseDlx2     | .GSASHLQAT  | APLLHPSQTP | QAHHHHHHHH  | HAGGGAPVSA | GTIF  |
| mouseDlx3     | .LSGPHLQQQ  | PPQPAT.... | .....LHHAS. | ...PGPPP   | GAVY  |
| zfishDlx3     | ...GSHLQH.  | P.....     | .....VHH... | ...PGPPQSV | GAVY  |
| xenopusxldll2 | .QPGQHLQPS  | E.....     | .....VMHQ.. | .....PPP.  | .TVY  |
| xenopusDll2   | .QSGQHLQPS  | E.....     | .....VMHQ.. | .....PPP.  | .TVY  |
| Delta         | .QESMANQPV  | M.....     | .....       | .....      | ..... |
| Alpha         | QHQQQQQQQQ  | QQQQQQQSGG | PTAFRHSPPS  | LLALAQPECK | WRHF  |
| Gamma         | QQQQQLHAQYP | PVGPWFGGHS | HLQGPSTYGQ  | QQTTPPLLHA | PHID  |
| Beta          | SSSSSSSSST  | YQPWYRPPHD | STFAPPSSTA  | VAAAMQPLCG | GAAV  |
| amphi         | HGELHELSP   | LPLSMALPGT | AAAIPTTPNI  | EQYVLPPVNF | LQRL  |
